# Supplementary material
Source: PubMed Central journal article supplement (PMC3303958)

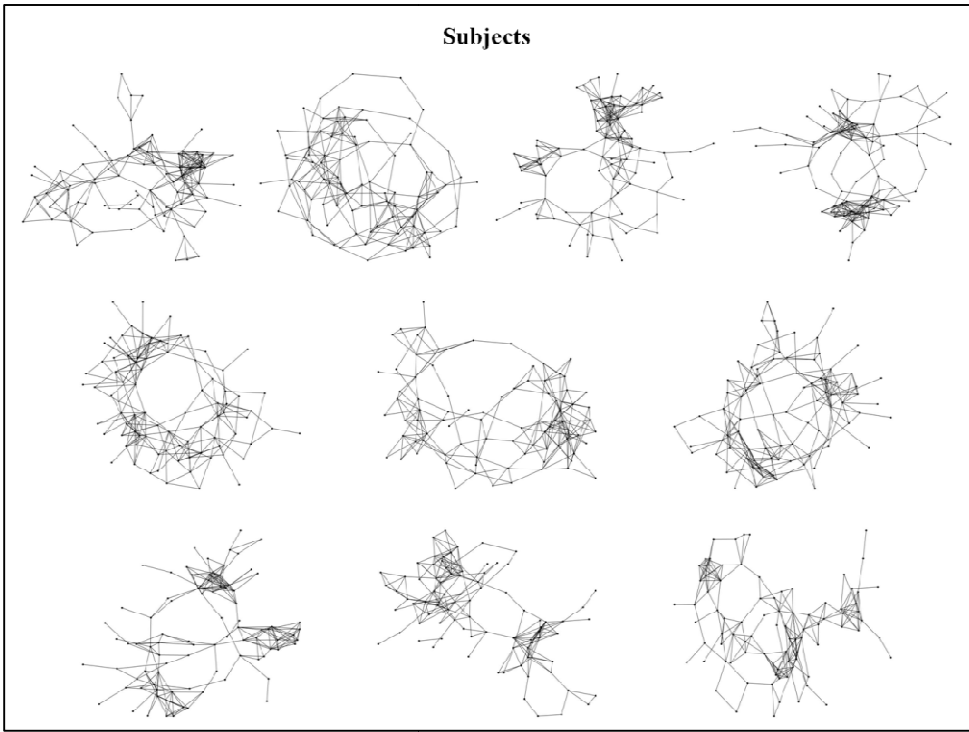

**Supplementary Fig. 1.** Harel-Koren Fast Multiscale graphs for the 10 subjects' networks.

Supplement: NIHMS350859-supplement-01.pdf [file NIHMS350859-supplement-01.pdf]
